# Supplementary material for: Template-assisted in situ confinement synthesis of nitrogen and oxygen co-doped 3D porous carbon network for high-performance sodium-ion battery anode
Source: Royal Society of Chemistry journal article supplement (doi:10.1039/c8nj02394h), 2018-01-01
Supplement: c8nj02394h1.pdf [file c8nj02394h1.pdf]

## Supplementary material

**Template-assisted in-situ confinement synthesis of nitrogen and oxygen co-doped**

**3D porous carbon network for high-performance sodium-ion batteries anode**

Dan Wang <sup>a,b,c</sup>, Zhiyuan Wang <sup>a,b,c,\*</sup>, Yuan Li <sup>b</sup>, Shaohua Luo <sup>a,b,c</sup>, Kangze Dong <sup>a</sup>, Yanguo Liu <sup>a,b,c</sup>,

Xiwei Qi <sup>a,b,c</sup>

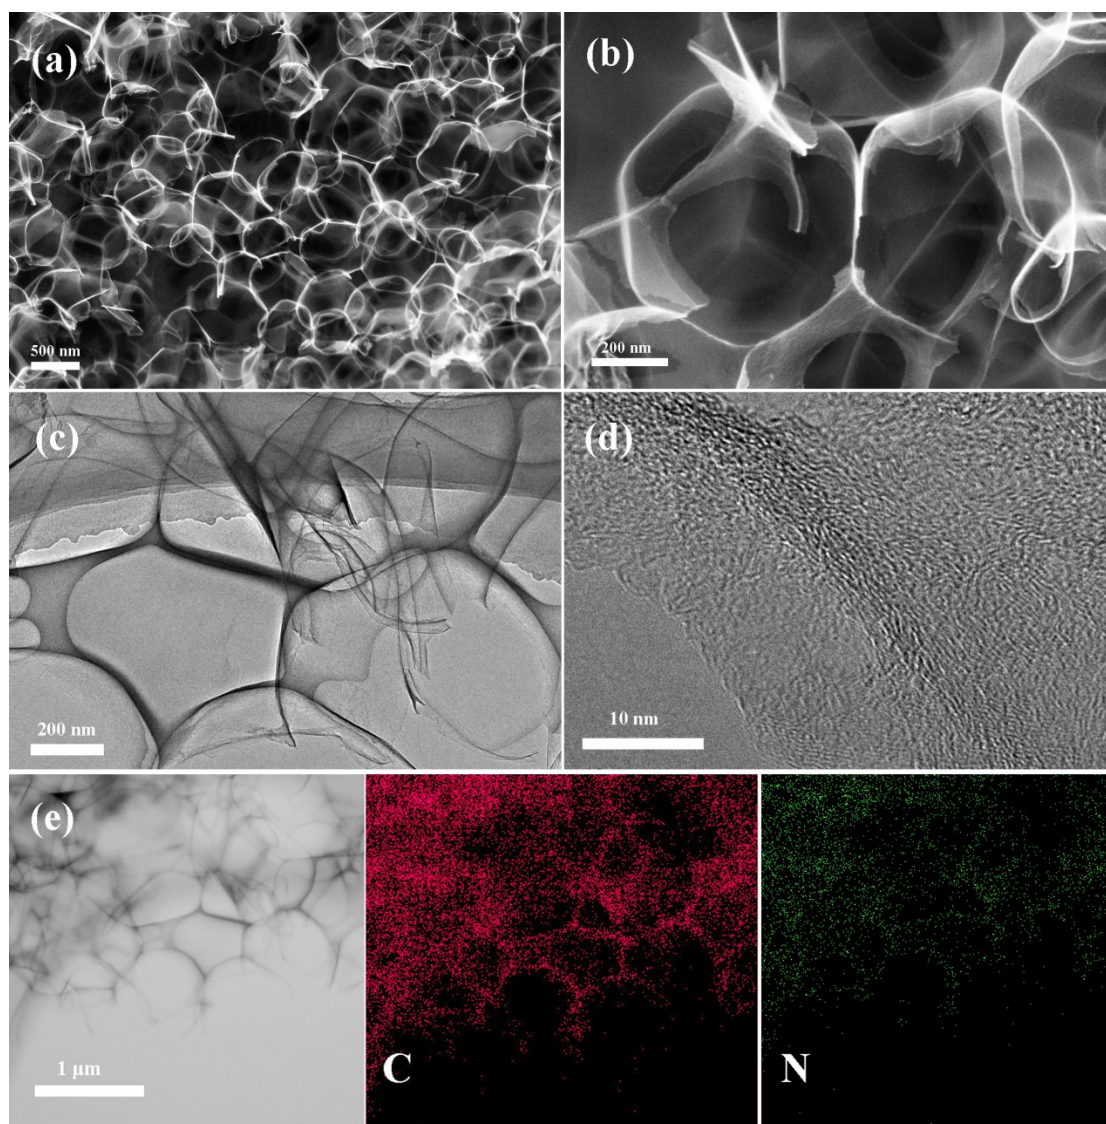

Fig.S1 (a) (b) SEM images of PU-N (c) (d) TEM of PU-N (e) TEM atomic distribution of PU-N

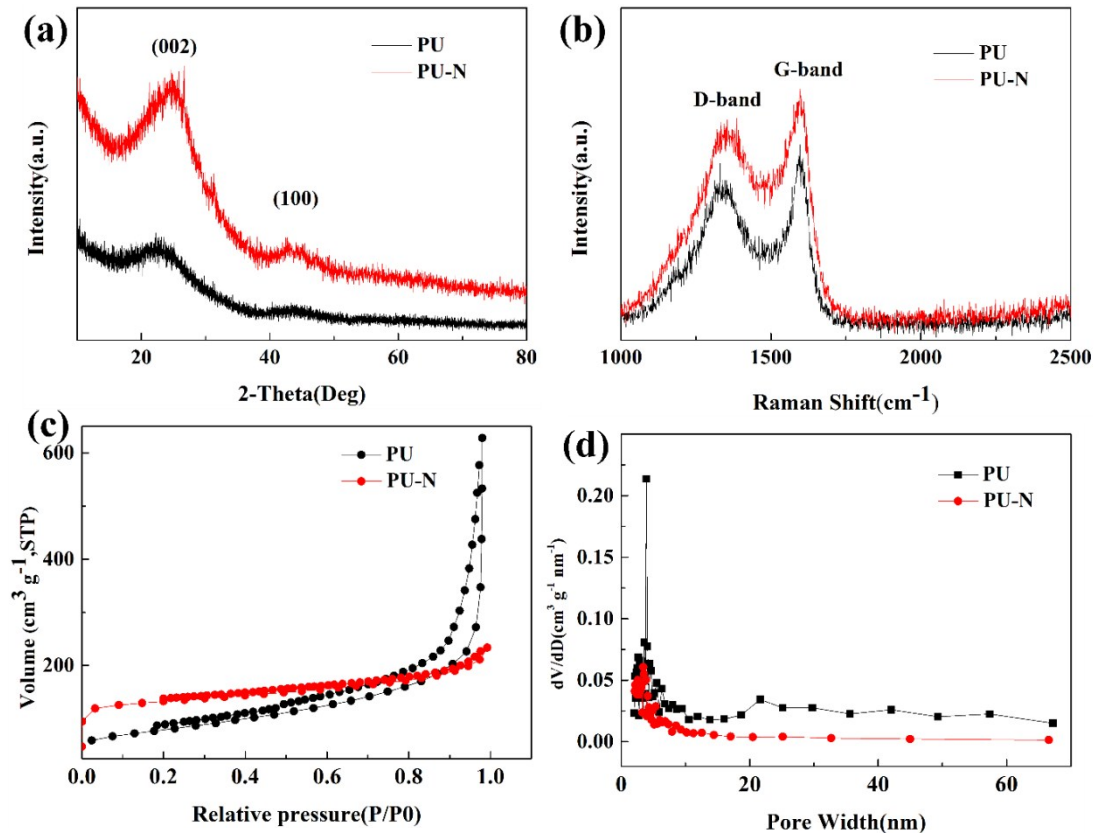

Fig.S2 (a)XRD of PU-N and PU (b) Raman spectra of PU-N and PU (c)Adsorption and desorption isothermal curve of PU-N and PU (d)Dehydration pore volume distribution of NING-N (e),(f)

XPS core-level C1s and N1s spectra of PU-N

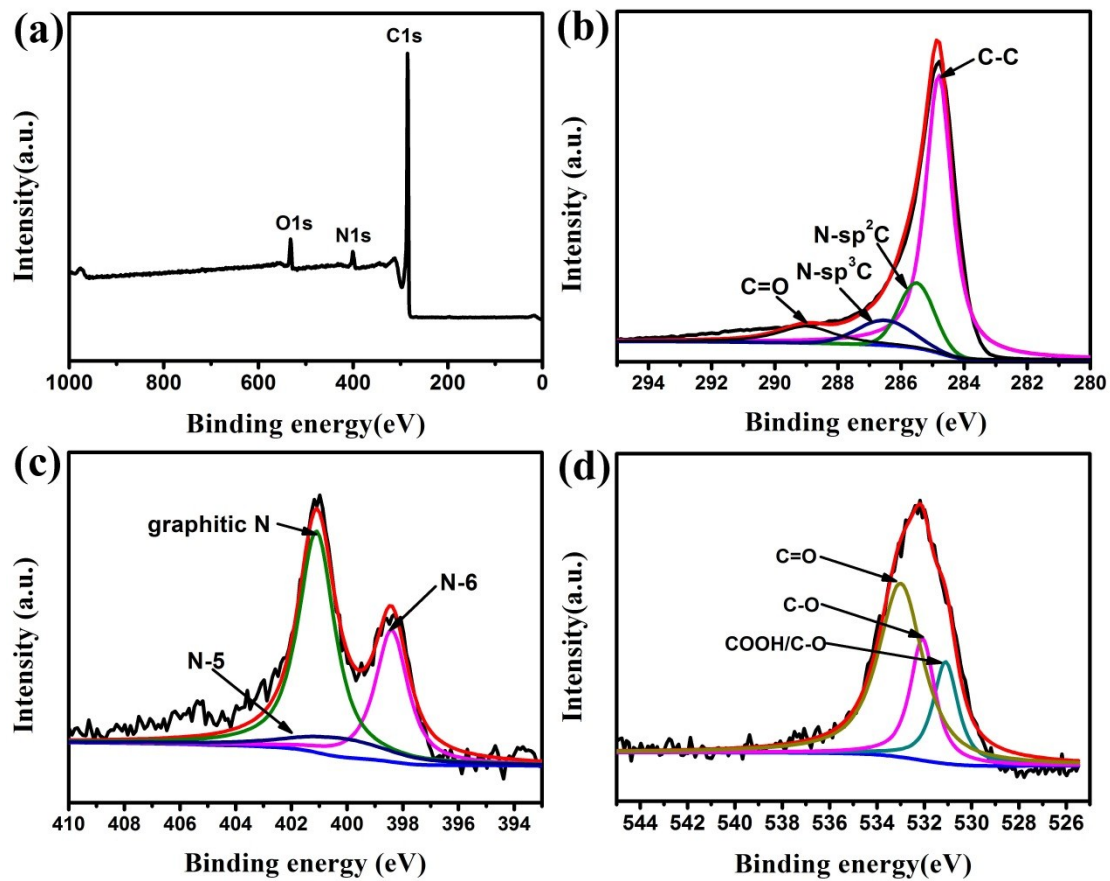

Fig.S3 (a) XPS survey spectra, (b-d) high resolution C1s, N1s, and O1s spectra of PU-N.

Table S1. Atomic% of PU-N

| samples | PU-N  |
|---------|-------|
| Name    |       |
| N1s     | 4.75  |
| C1s     | 90.34 |
| O1s     | 4.91  |

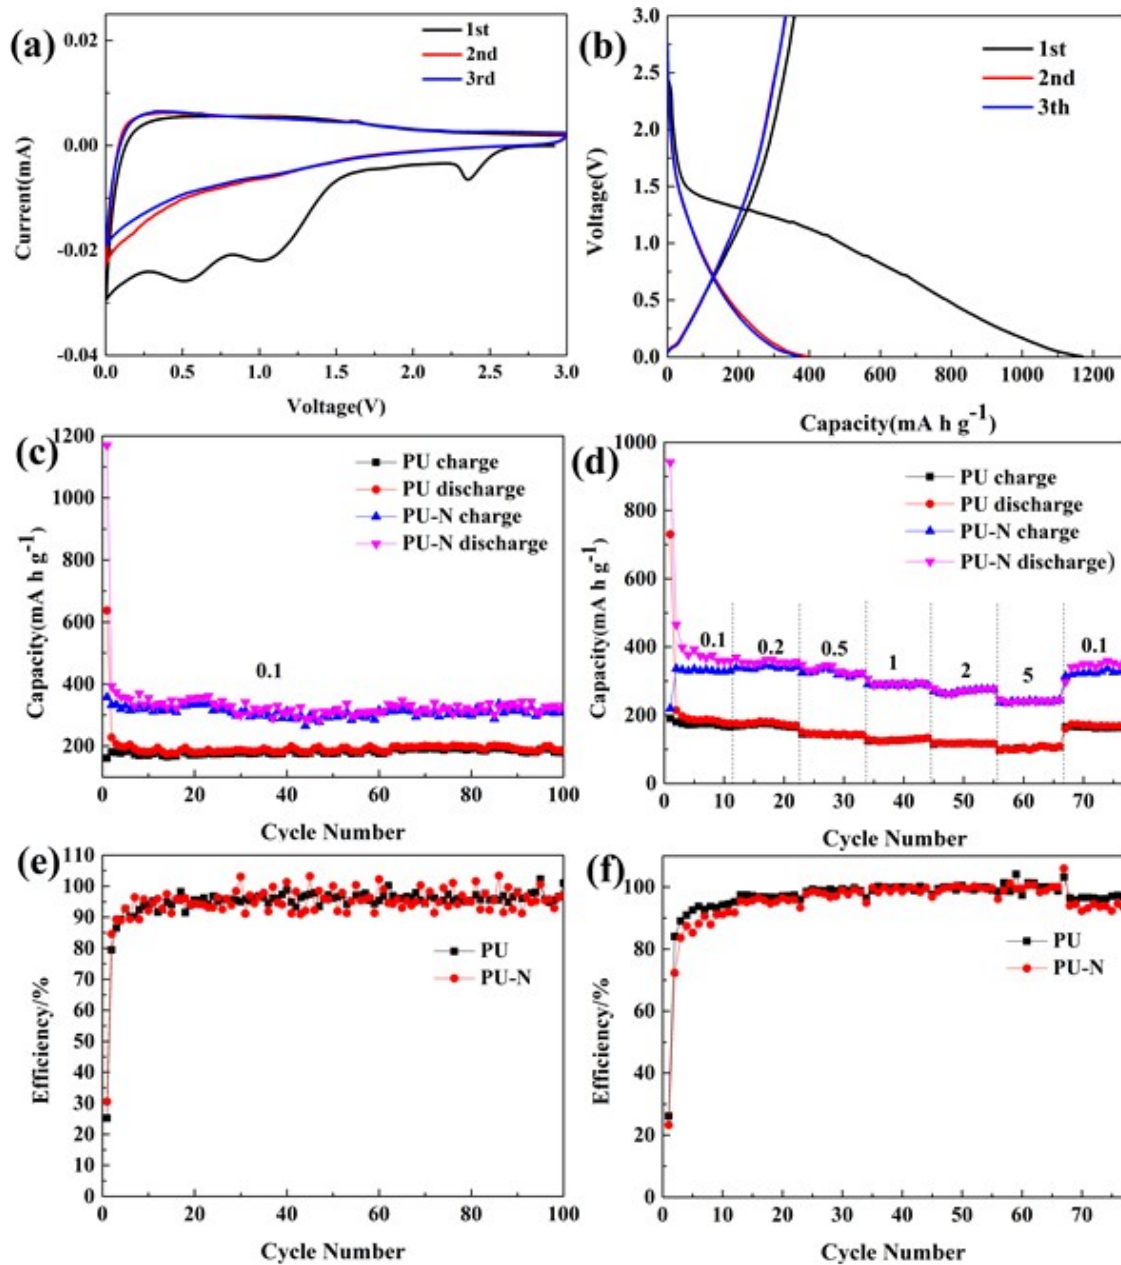

Fig.S4 (a) The cyclic voltammetry test of PU-N for first 3 cycles (b) Discharge/charge curves of PU-N for first 3 cycles. (c),(e) Cycling performance of PU-N and PU at 0.1 A g<sup>-1</sup> for first 100 cycles (d),(f) Rate capability of the PU-N and PU at various rate(A g<sup>-1</sup>)



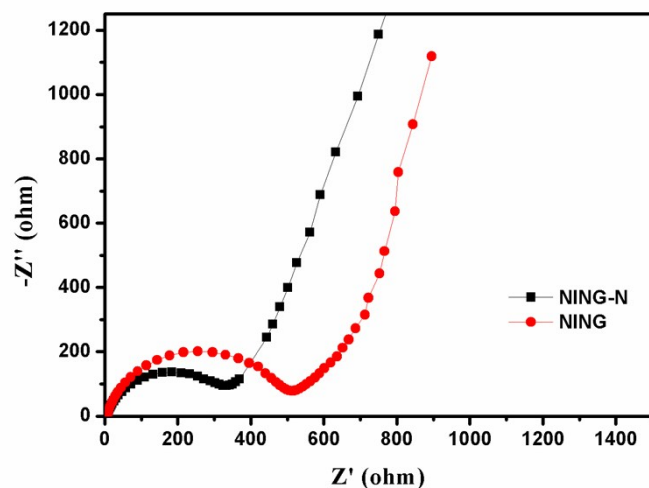

Fig.S5 Nyquist plots of NING-N and NING measured with 5 mV over the frequency range of 100 kHz and 0.01 Hz before cycling.

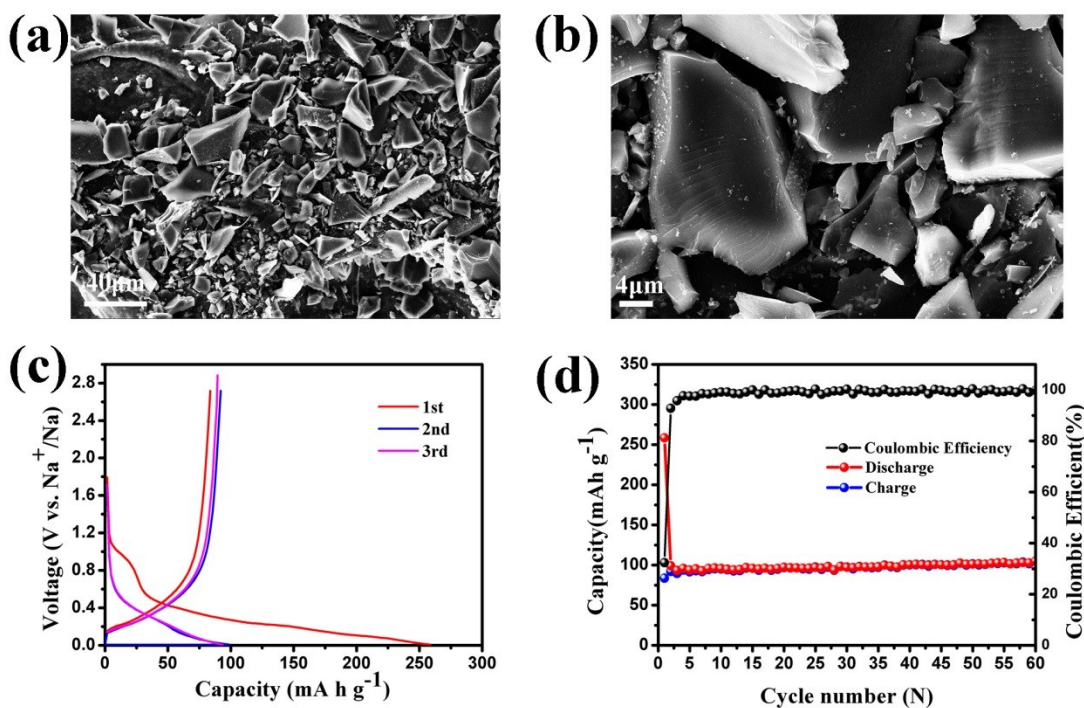

Fig.S6 The morphology and electrochemical performance of carbon materials prepared without adding NaCl. (a,b) SEM images, c) the initial three charge and discharge curves, d) the cycling performance at 100 mA g<sup>-1</sup> for 60 cycles.

**Table S2.** Performance comparison of NING-N with other heteroatom-doped carbon for SIBs

| Materials                  | 1 <sup>st</sup> Capacity/rate<br>(mAh g <sup>-1</sup> /A g <sup>-1</sup> ) | Capacity/rate/cycles<br>(mAh g <sup>-1</sup> /A g <sup>-1</sup> /cycles) | Rate: Capacity<br>(A g <sup>-1</sup> : mAh g <sup>-1</sup> ) | Reference |
|----------------------------|----------------------------------------------------------------------------|--------------------------------------------------------------------------|--------------------------------------------------------------|-----------|
| N,O-coped 3D porous carbon | 402./0.1                                                                   | 416 /0.1/100                                                             | 5: 213                                                       | This work |

|                                     |          |              |          |    |
|-------------------------------------|----------|--------------|----------|----|
| N, P-doped carbon sheets            | 309/0.05 | 277/0.05/100 | 2: 122   | S1 |
| N,P co-doped carbon foams           | 474/0.05 | 394/0.05/100 | 4: 159   | S2 |
| N-doped amorphous carbon nanofibers | 323/0.05 | 320/0.05/50  | 1: 120   | S3 |
| N, O and S tridoped porous carbon   | 337/0.1  | 227/0.1/100  | 5: 128   | S4 |
| N-doped carbon sheets               | 765/0.05 | 382/0.05/55  | 5: 84    | S5 |
| Porous N-doped carbon sphere        | 307/0.2  | 206/0.2/600  | 1: 155   | S6 |
| N,P co-doped carbon microspheres    | 355/0.05 | 275/0.1/90   | 5: 136   | S7 |
| N-doped Porous Carbon               | 240/0.1  | 224/0.1/100  | 3.2: 104 | S8 |
| N-doped porous carbon fibres        | 296/0.05 | 243/0.05/100 | 5: 101   | S9 |

### Supplementary Reference

- 1 D. Qin, Z. Liu, Y. Zhao, G. Xu, F. Zhang and X. Zhang, *Carbon*, 2018, **130**, 664-671.
- 2 Y. Chen, J. Li, Y. Lai, M. Yin and Z. Zhang, *J. Electroanal. Chem.*, 2018, **810**, 207-215.
- 3 R. Hao, Y. Yang, H. Wang, B. Jia, G. Ma, D. Yu, L. Guo and S. Yang, *Nano Energy*, 2018, **45**, 220-228.
- 4 M. Lu, W. Yu, J. Shi, W. Liu, S. Chen, X. Wang and H. Wang, *Electrochim. Acta*, 2017, **251**, 396-406 .
- 5 F. Yang, Z. Zhang, K. Du, X. Zhao, W. Chen, Y. Lai and J. Li, *Carbon*, 2015, **91**, 88-95.
- 6 D. Li, H. Chen, G. Liu, M. Wei, L. X. Ding, S. Wang and H. Wang, *Carbon*, 2015, **94**, 888-894.
- 7 Y. Li, Z. Wang, L. Li, S. Peng, L. Zhang, M. Srinivasan and S. Ramakrishna, *Carbon*, 2016, **99**, 556-563.
- 8 G. Zhao, G. Zou, X. Qiu, S. Li, T. Guo, H. Hou and X. Ji, *Electrochim. Acta*, 2017, **240**, 24-30.
- 9 L. Fu, K. Tang, K. Song, P. A. van Aken, Y. Yu and J. Maier, *Nanoscale*, 2014, **6**, 1384-1389.
